# Supplementary material for: Moxifloxacin detection based on fluorescence resonance energy transfer from carbon quantum dots to moxifloxacin using a ratiometric fluorescence probe
Source: Royal Society of Chemistry journal article supplement (doi:10.1039/d1nj05961k), 2022-01-01
Supplement: d1nj05961k1.pdf [file d1nj05961k1.pdf]

## Supporting Information

### **Ratiometric fluorescence detection of moxifloxacin based on fluorescence resonance energy transfer from carbon quantum dots to moxifloxacin**

Zhiwen Li<sup>1,2</sup>, Jiyue Zhang<sup>1,2</sup>, Qiyao Sun<sup>1,2</sup>, Wenwen Shi<sup>1,2</sup>, Tingxian  
Tao<sup>1,2\*</sup> and Yingqiang Fu<sup>1,2,a,\*</sup>

<sup>1</sup>School of Chemical and Environmental Engineering, Anhui polytechnic University,  
Wuhu, Anhui 241000, P. R. China

<sup>2</sup>Anhui Province Key Laboratory of Functional Coordinated Complexes for Materials  
Chemistry and Application, Wuhu, Anhui 241000, P. R. China

<sup>a</sup>Email: fyq@ahpu.edu.cn

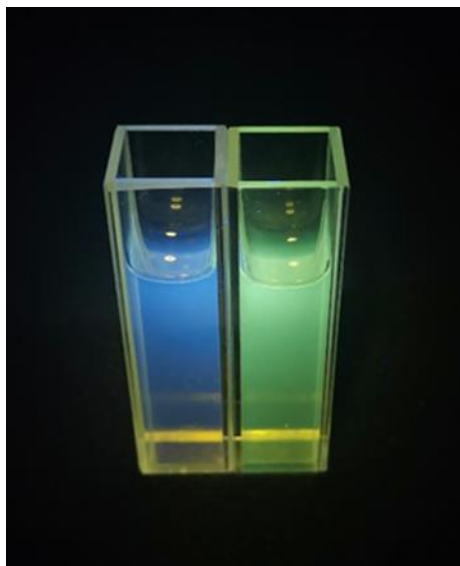

**Figure S1 Fluorescence of CQDs (left) and MOX/CQDs (right) under 365 nm UV lamp irradiation**

Figure S2 shows the HRTEM image of CQDs. As can be seen synthesized CQDs have a good spherical structure with a size distribution between 2.0 and 5.5 nm.

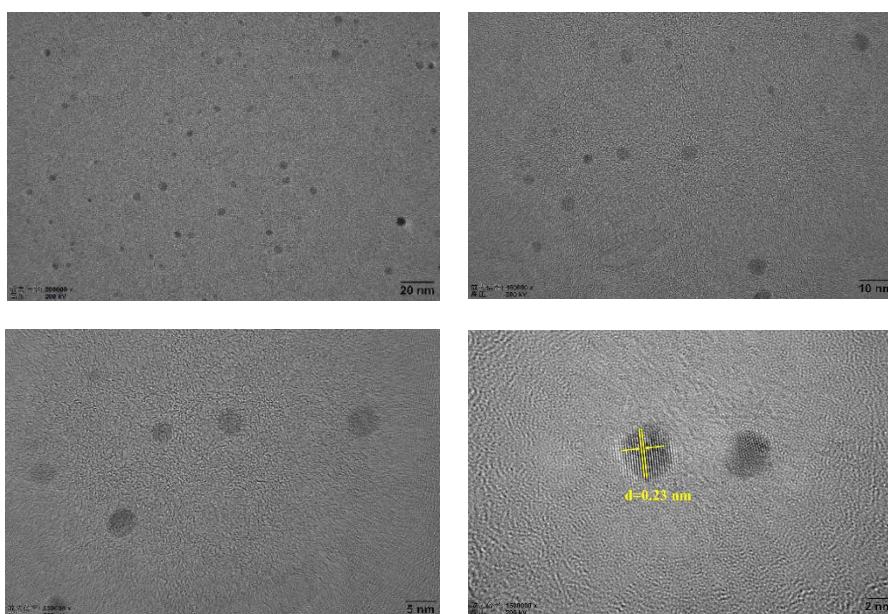

**Figure S2 The HRTEM image of CQDs**

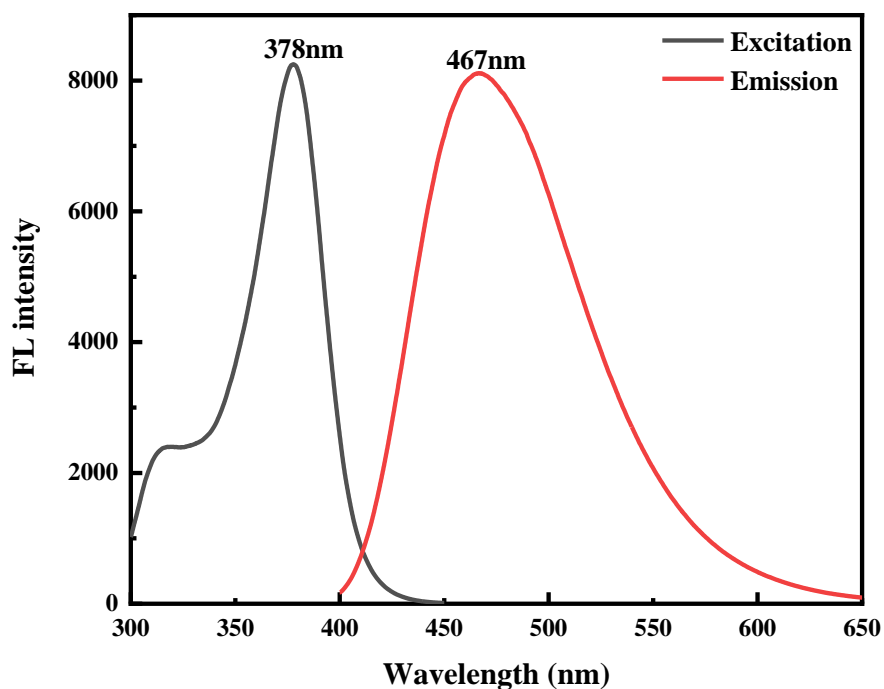

**Figure S3 Fluorescence spectrum of MOX**

In order to explore the effect of pH on the fluorescence intensity of CQDs (Figure S4) and CQDs/MOX  $F_{497}/F_{435}$  (Figure S5), a series of buffer solvents with pH (2.46~12.50) were accurately configured through a pH meter. The results showed that the fluorescence intensity of CQDs increased slightly in the range of pH 4.43 to 8.25, CQDs/MOX  $F_{497}/F_{435}$  is almost unchanged in the pH range of 4.43 to 11.44.

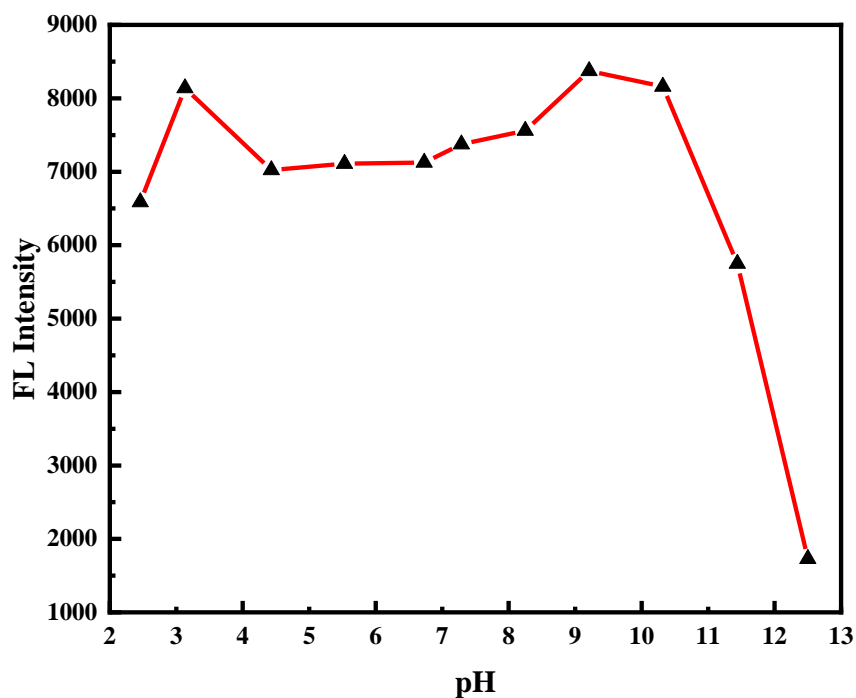

Figure S4 Effect of solution pH on fluorescence intensity of CQDs

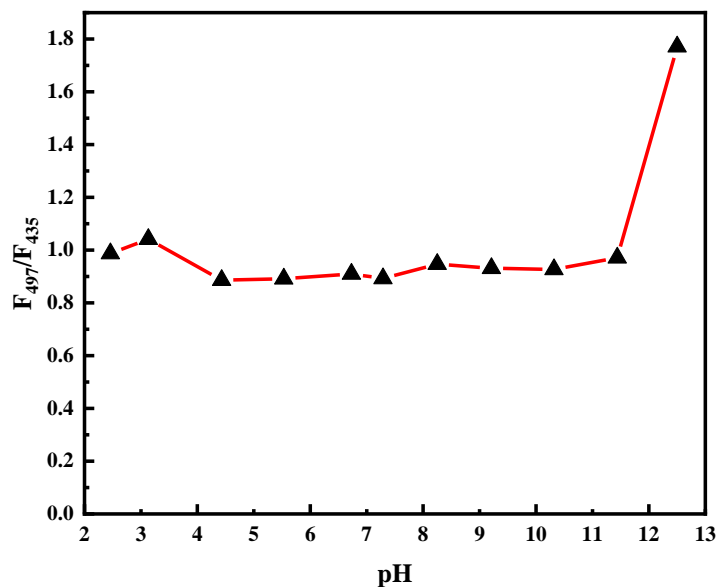

Figure S5 Effect of solution pH on CQDs/MOX  $F_{497}/F_{435}$

Figure S6 shows CQDs fluorescence intensity changes with storage time, The fluorescence intensity of CQDs decreases slightly as time increases; Figure S7 shows the relationship between CQDs/MOX  $F_{497}/F_{435}$  and reaction time, with the extension of the reaction time, it remains basically unchanged after 5 minutes.

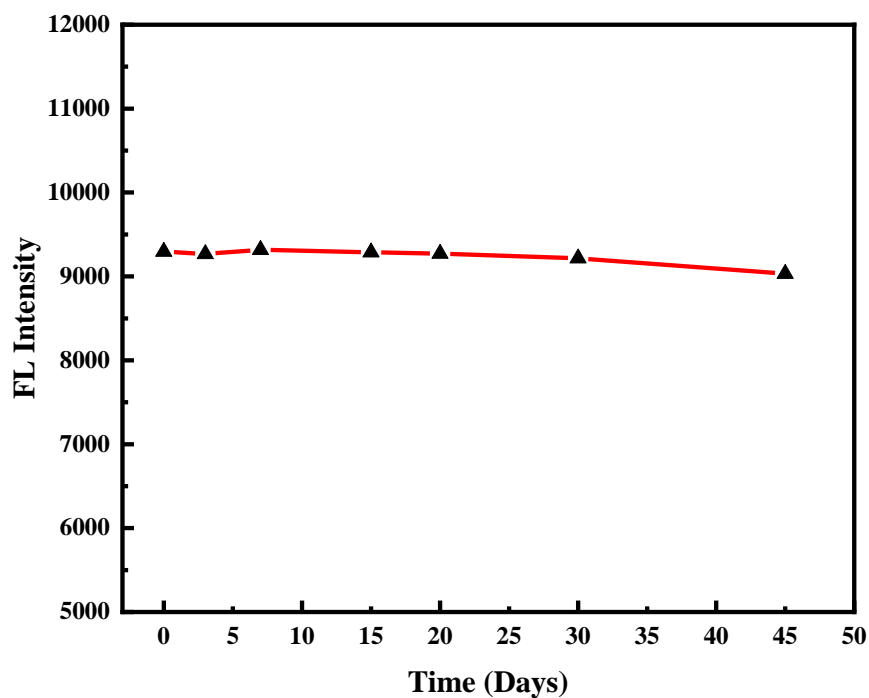

Figure S6 CQDs fluorescence intensity changes with storage time

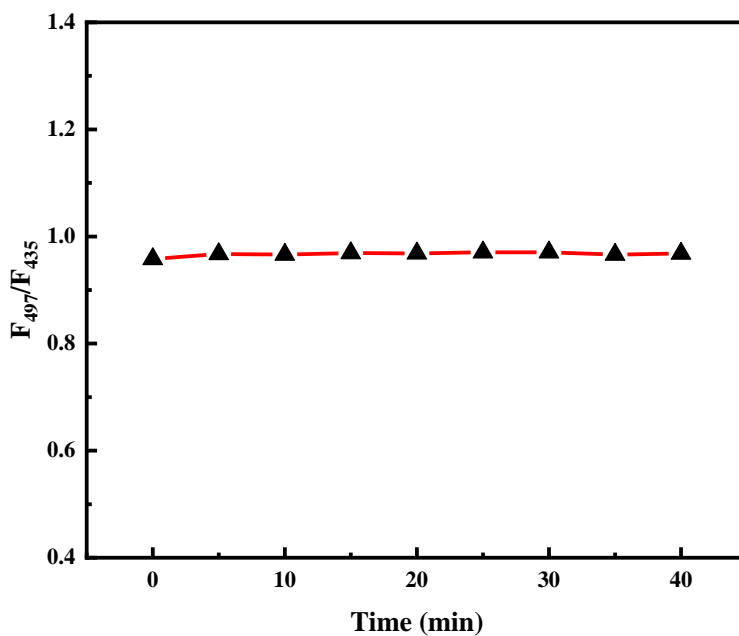

Figure S7 Relationship between CQDs/MOX  $F_{497}/F_{435}$  and reaction time
