# Supplementary figures and images for: Moxifloxacin detection based on fluorescence resonance energy transfer from carbon quantum dots to moxifloxacin using a ratiometric fluorescence probe
Source: Royal Society of Chemistry journal article supplement (doi:10.1039/d1nj05961k), 2022-01-01

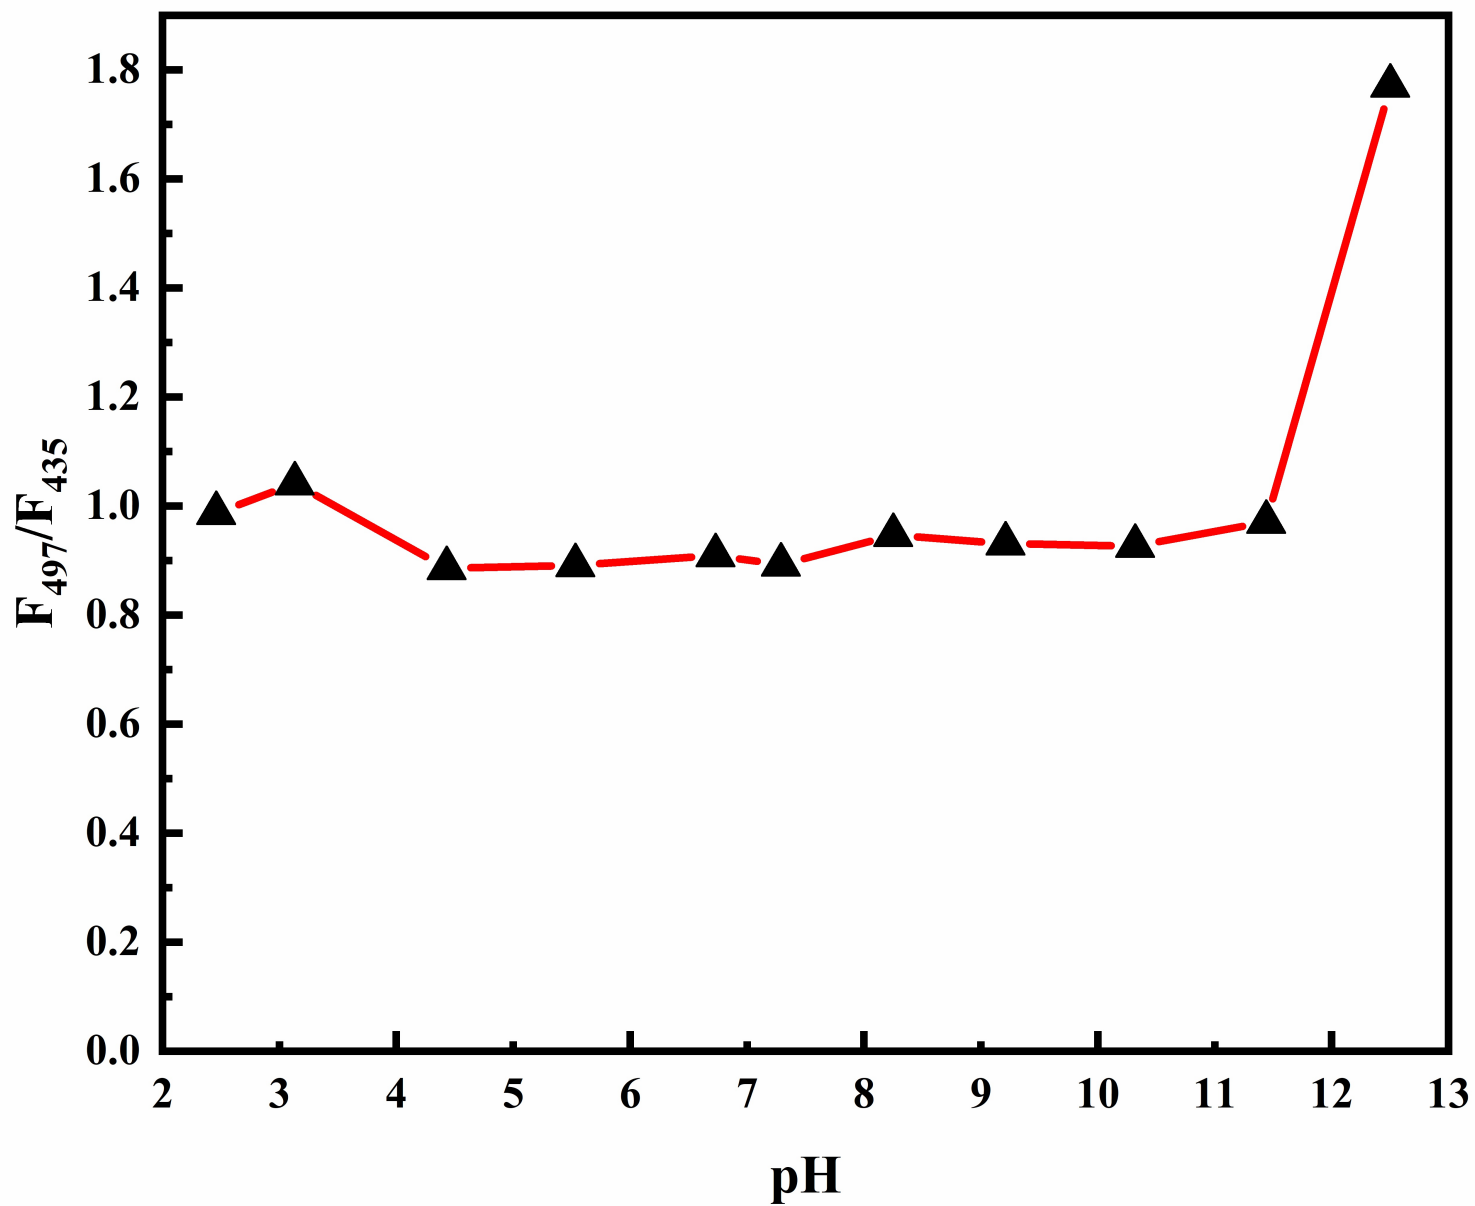

Supplement: d1nj05961k10.pdf [file d1nj05961k10.pdf]

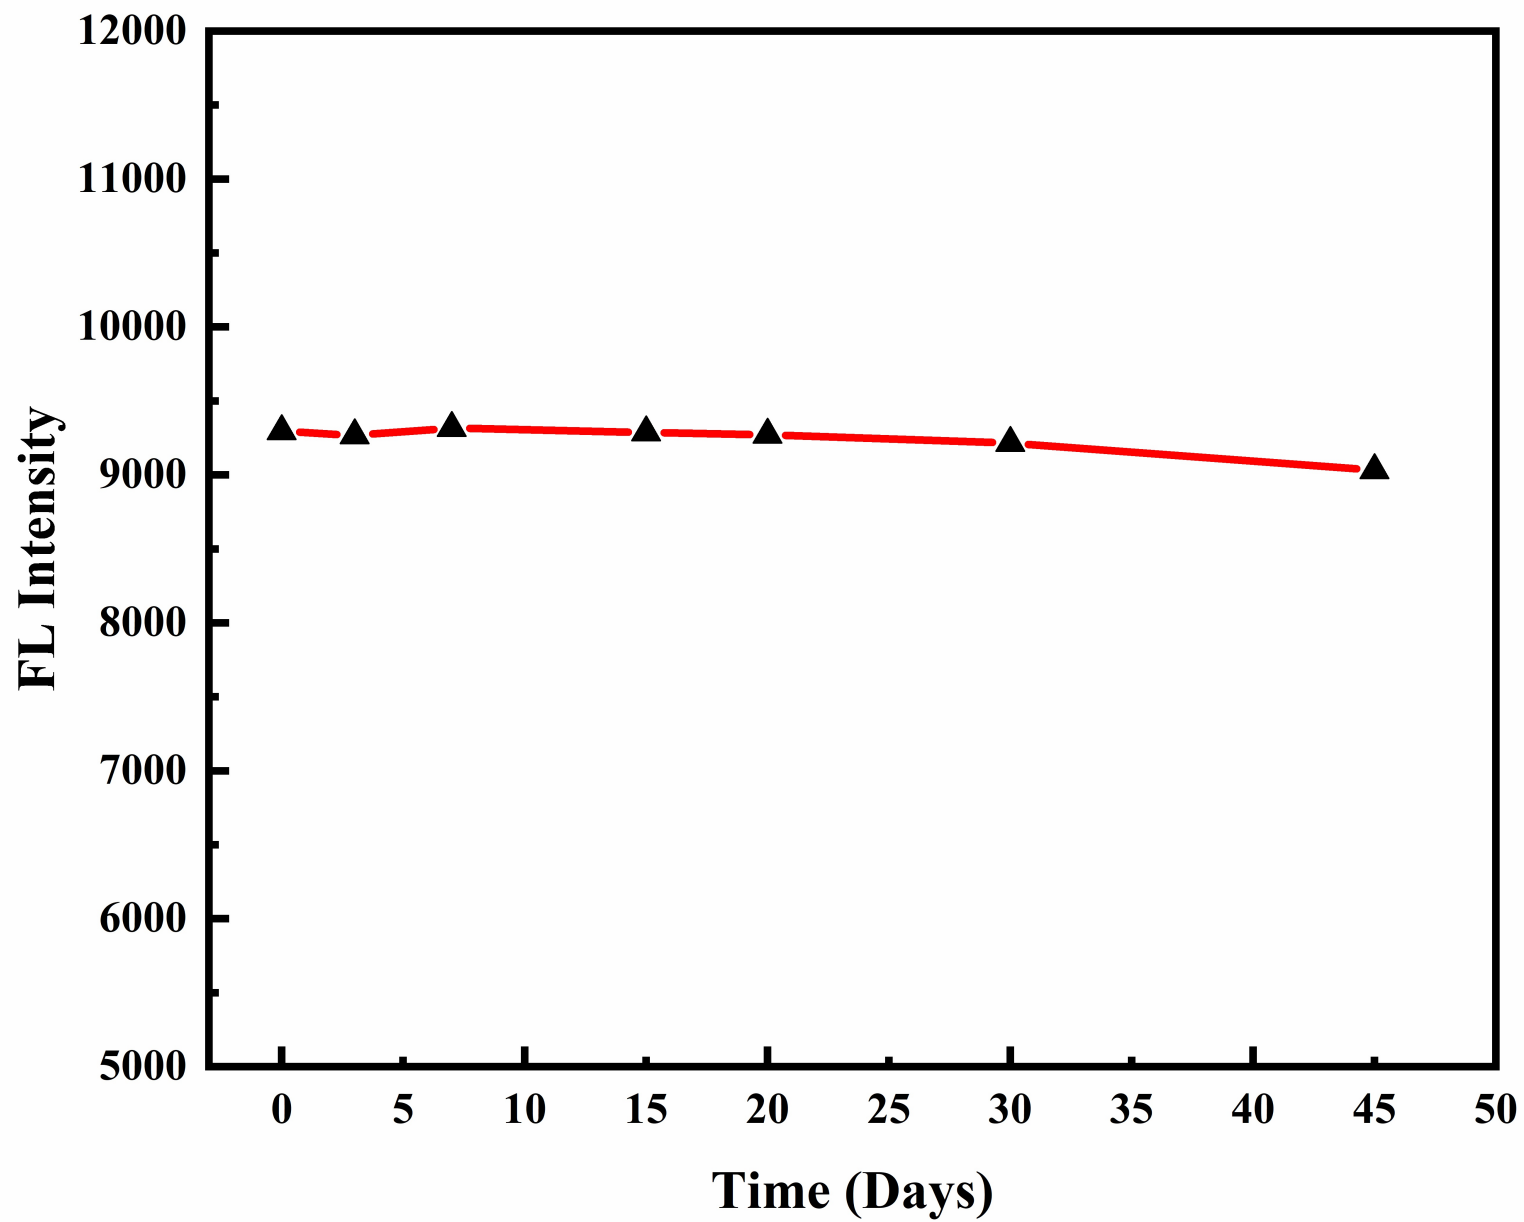

Supplement: d1nj05961k11.pdf [file d1nj05961k11.pdf]

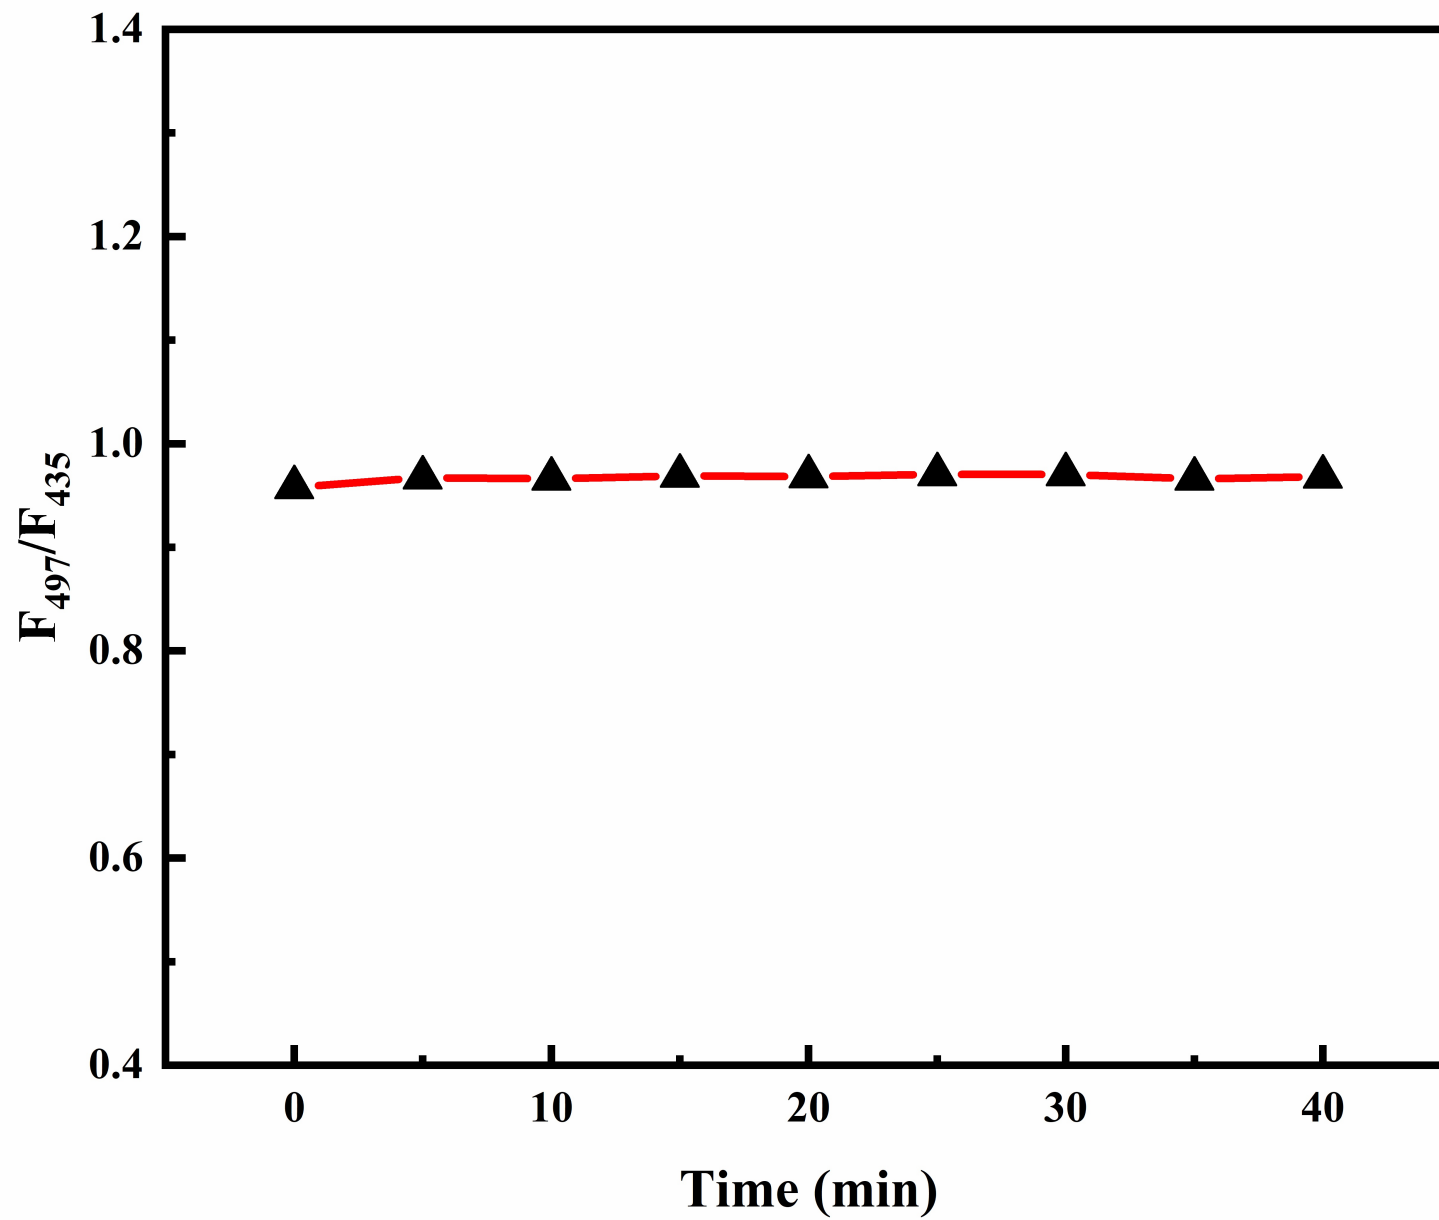

Supplement: d1nj05961k12.pdf [file d1nj05961k12.pdf]

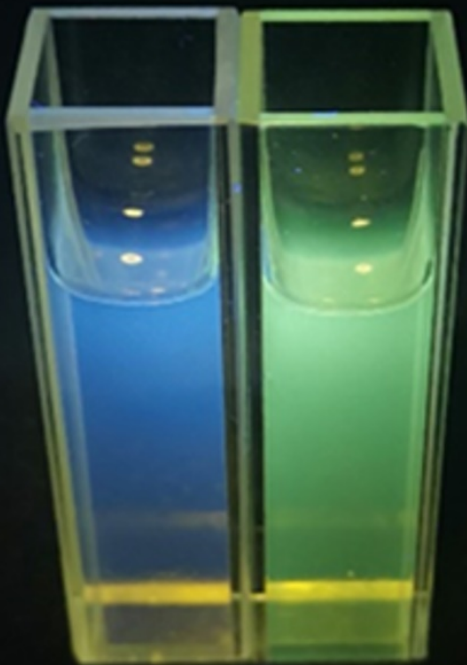

Supplement: d1nj05961k3.pdf [file d1nj05961k3.pdf]

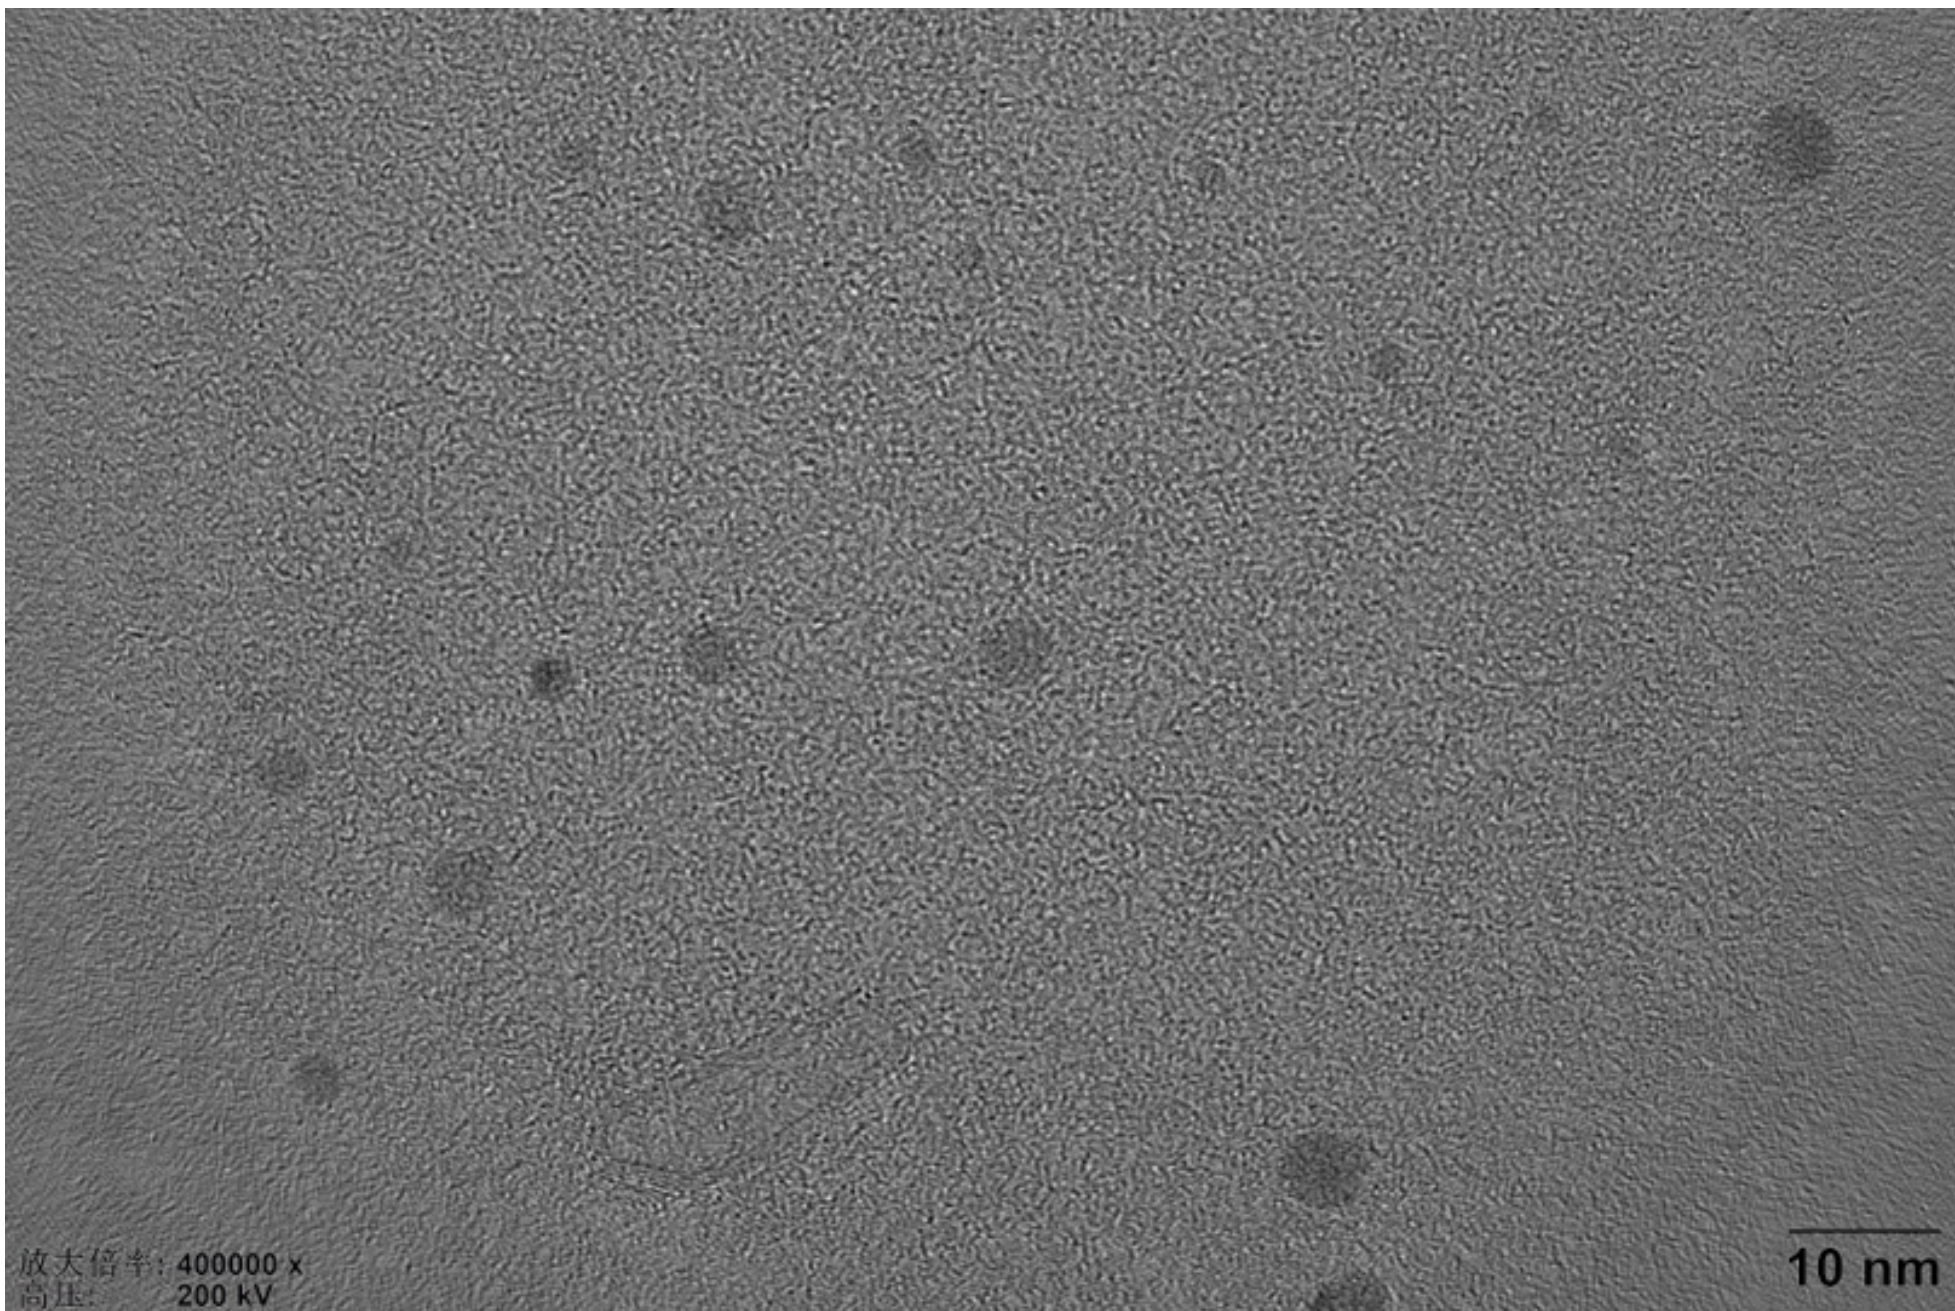

Supplement: d1nj05961k4.pdf [file d1nj05961k4.pdf]

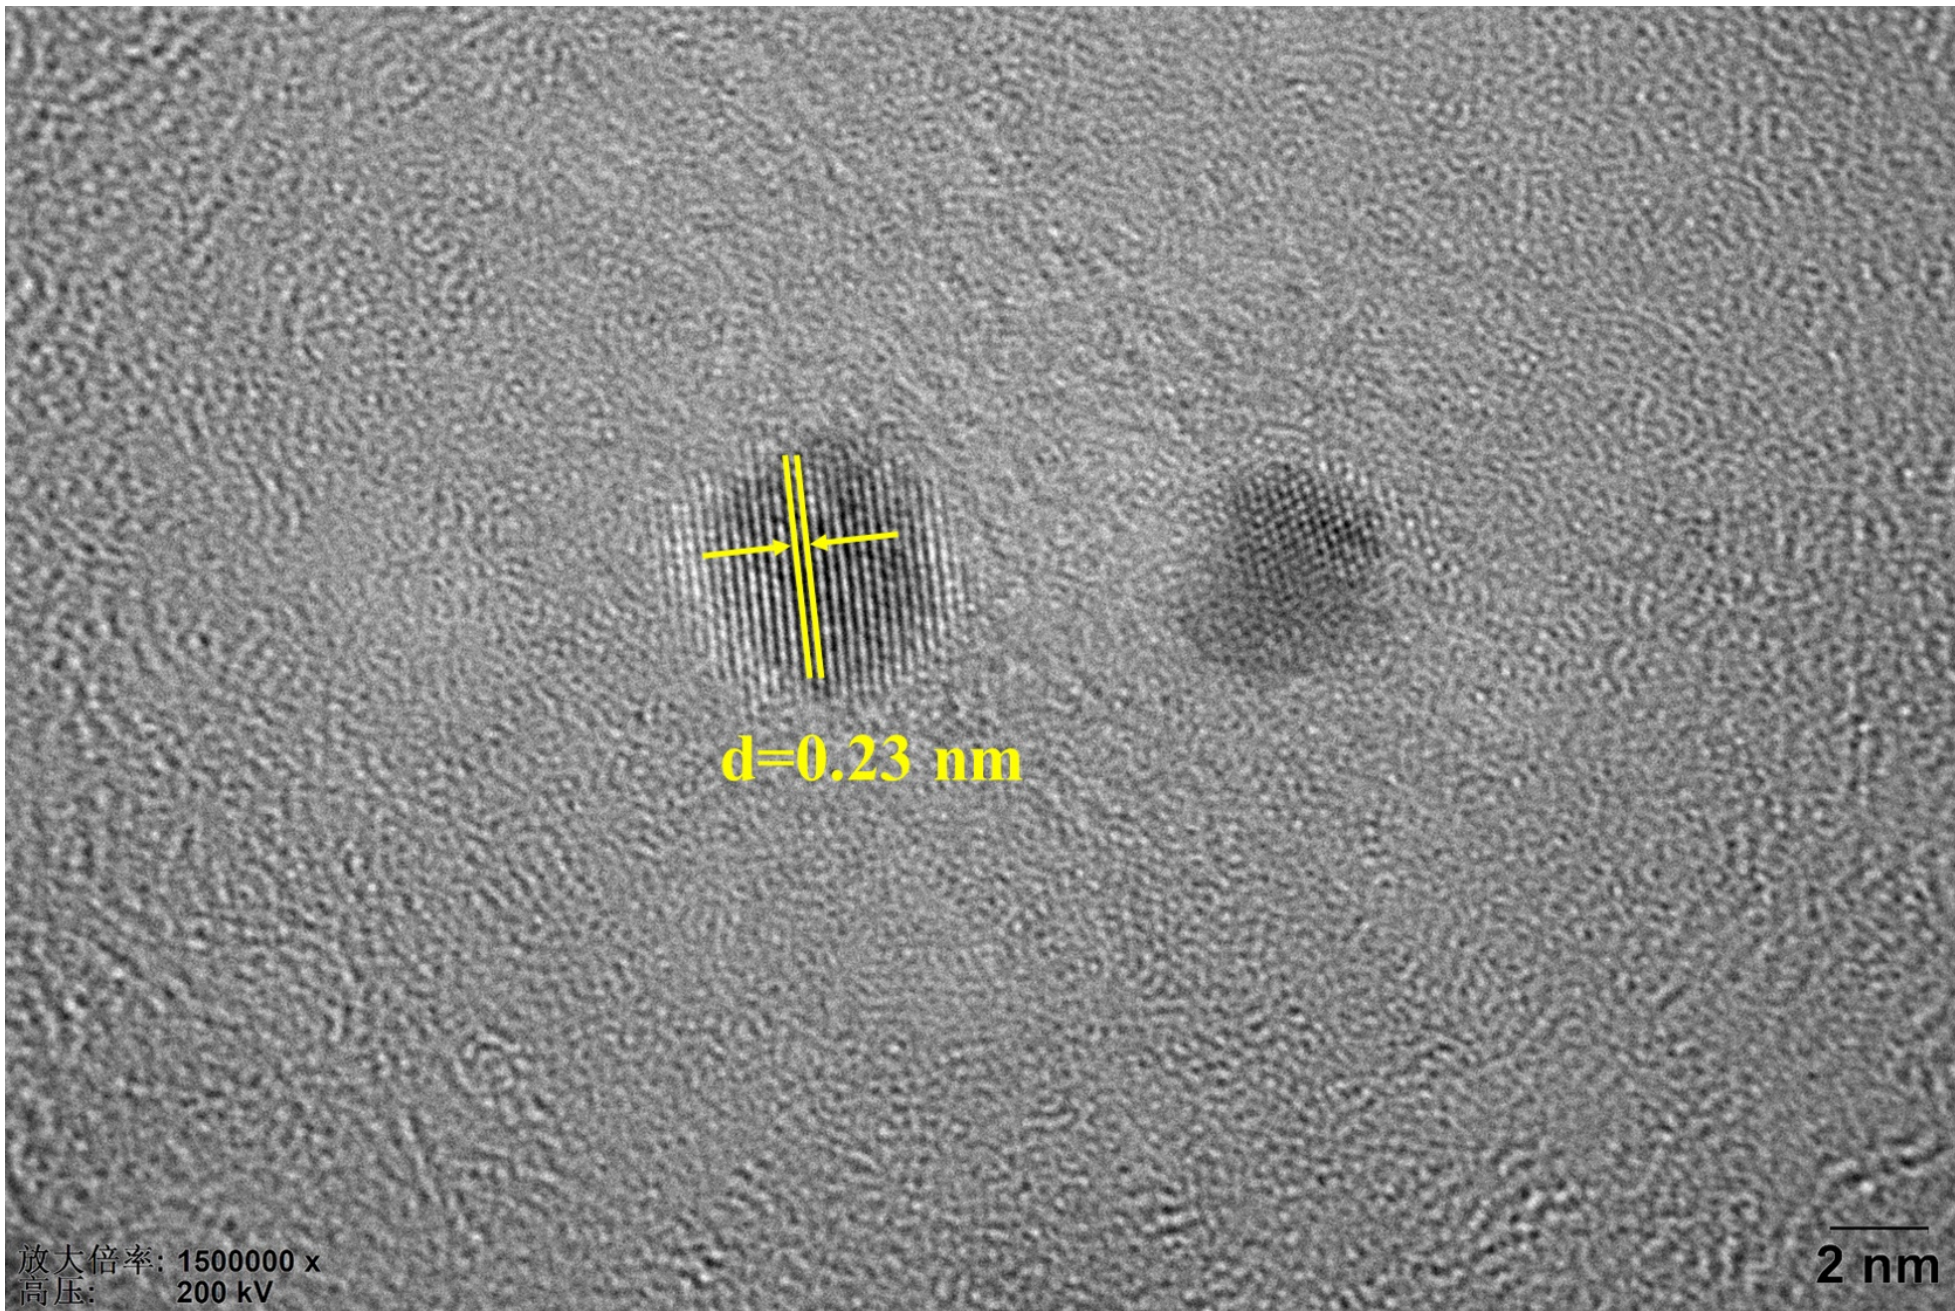

放大倍率: 1500000 x  
高压: 200 kV

2 nm

Supplement: d1nj05961k5.pdf [file d1nj05961k5.pdf]

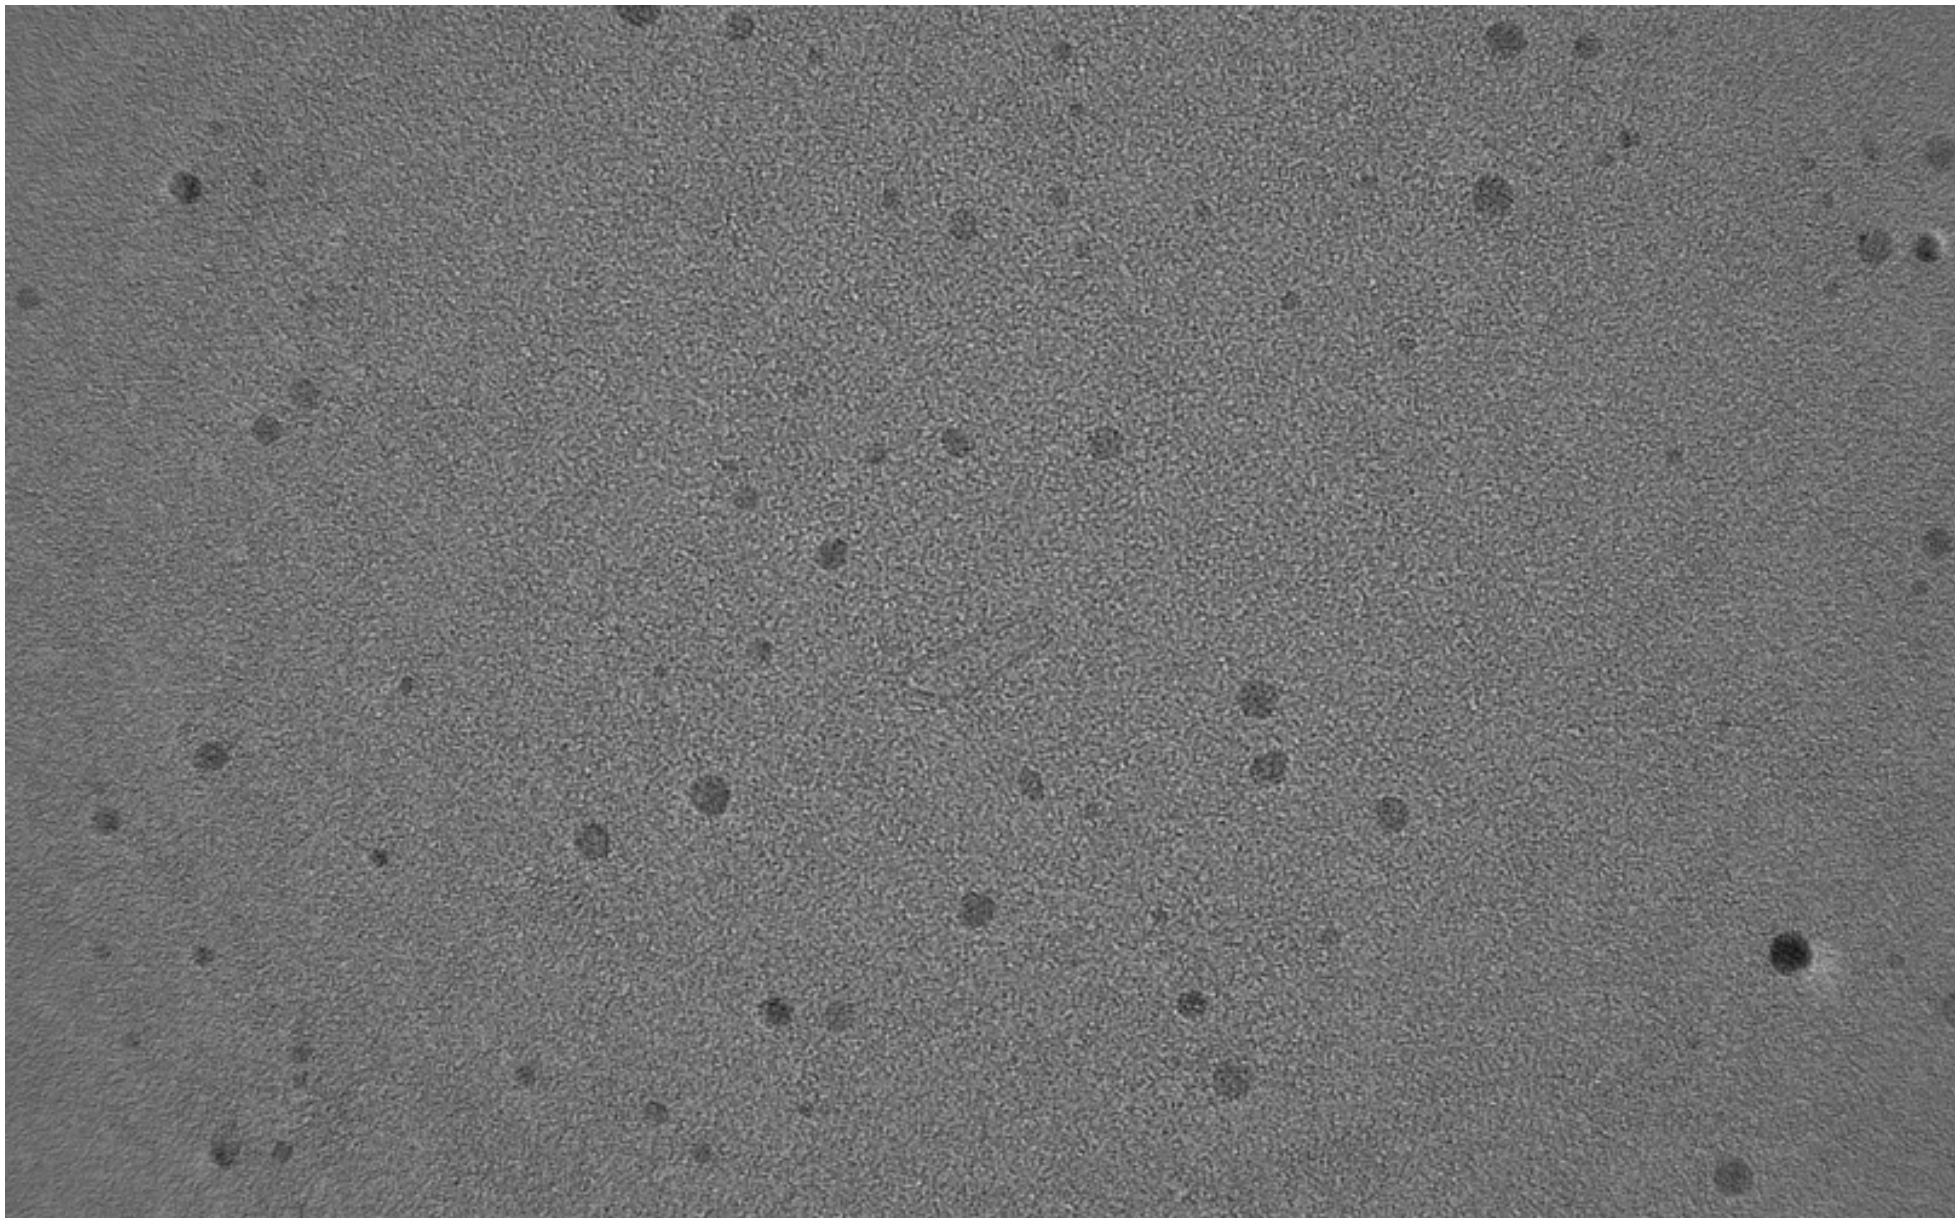

放大倍率: 200000 x  
高压: 200 kV

20 nm

Supplement: d1nj05961k6.pdf [file d1nj05961k6.pdf]

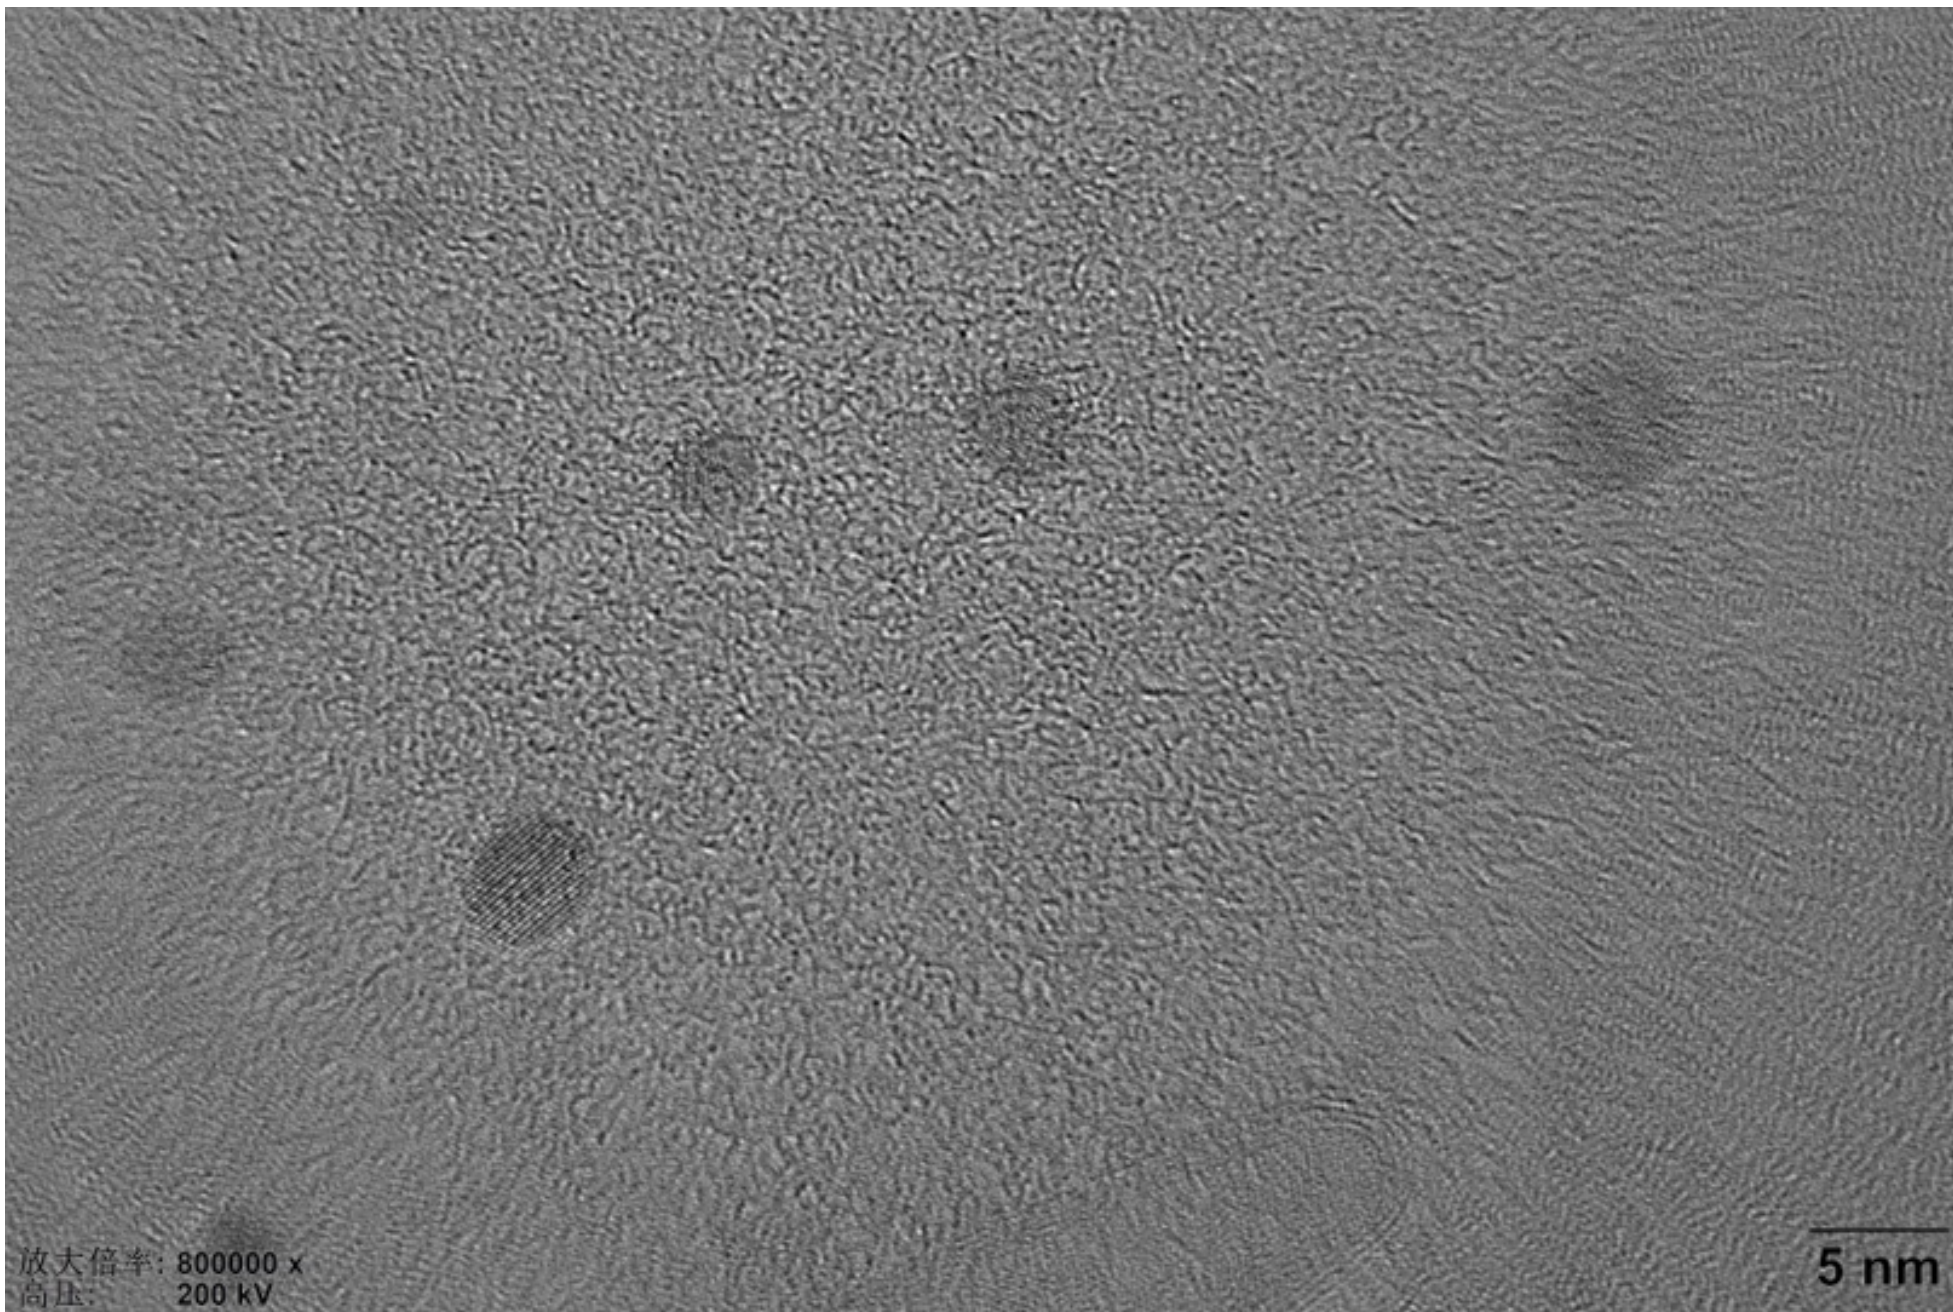

Supplement: d1nj05961k7.pdf [file d1nj05961k7.pdf]

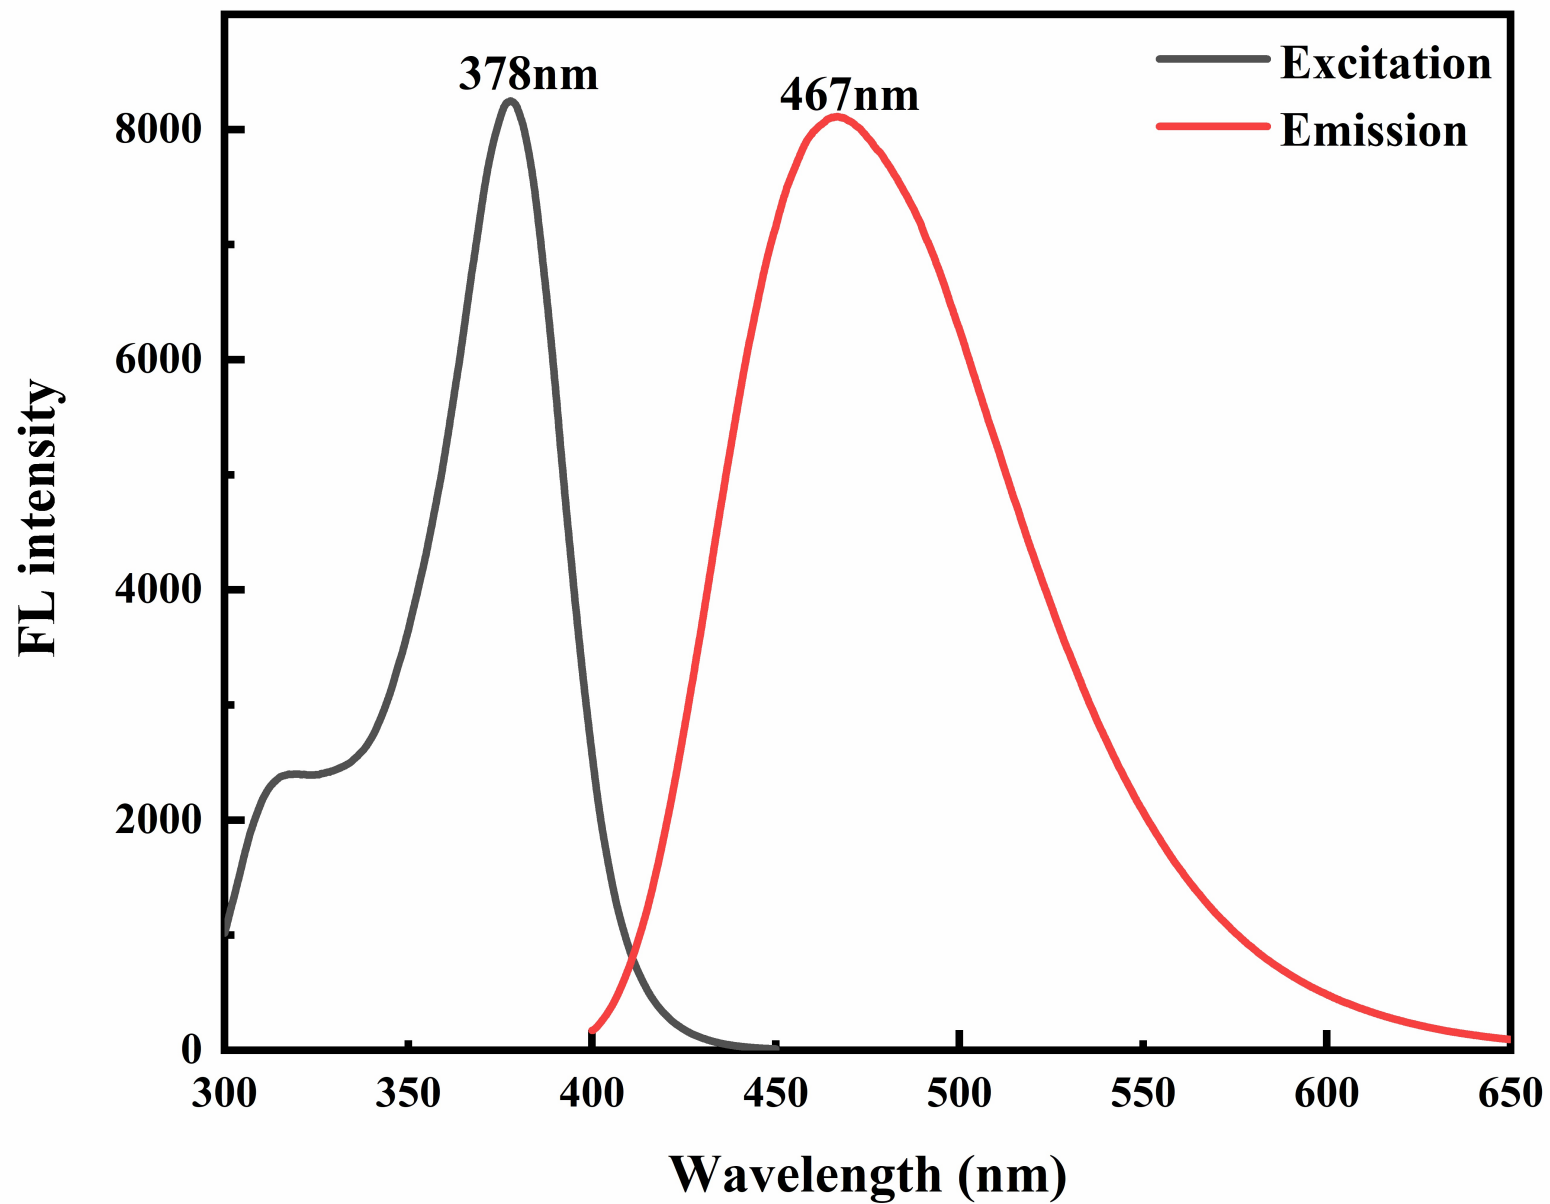

Supplement: d1nj05961k8.pdf [file d1nj05961k8.pdf]

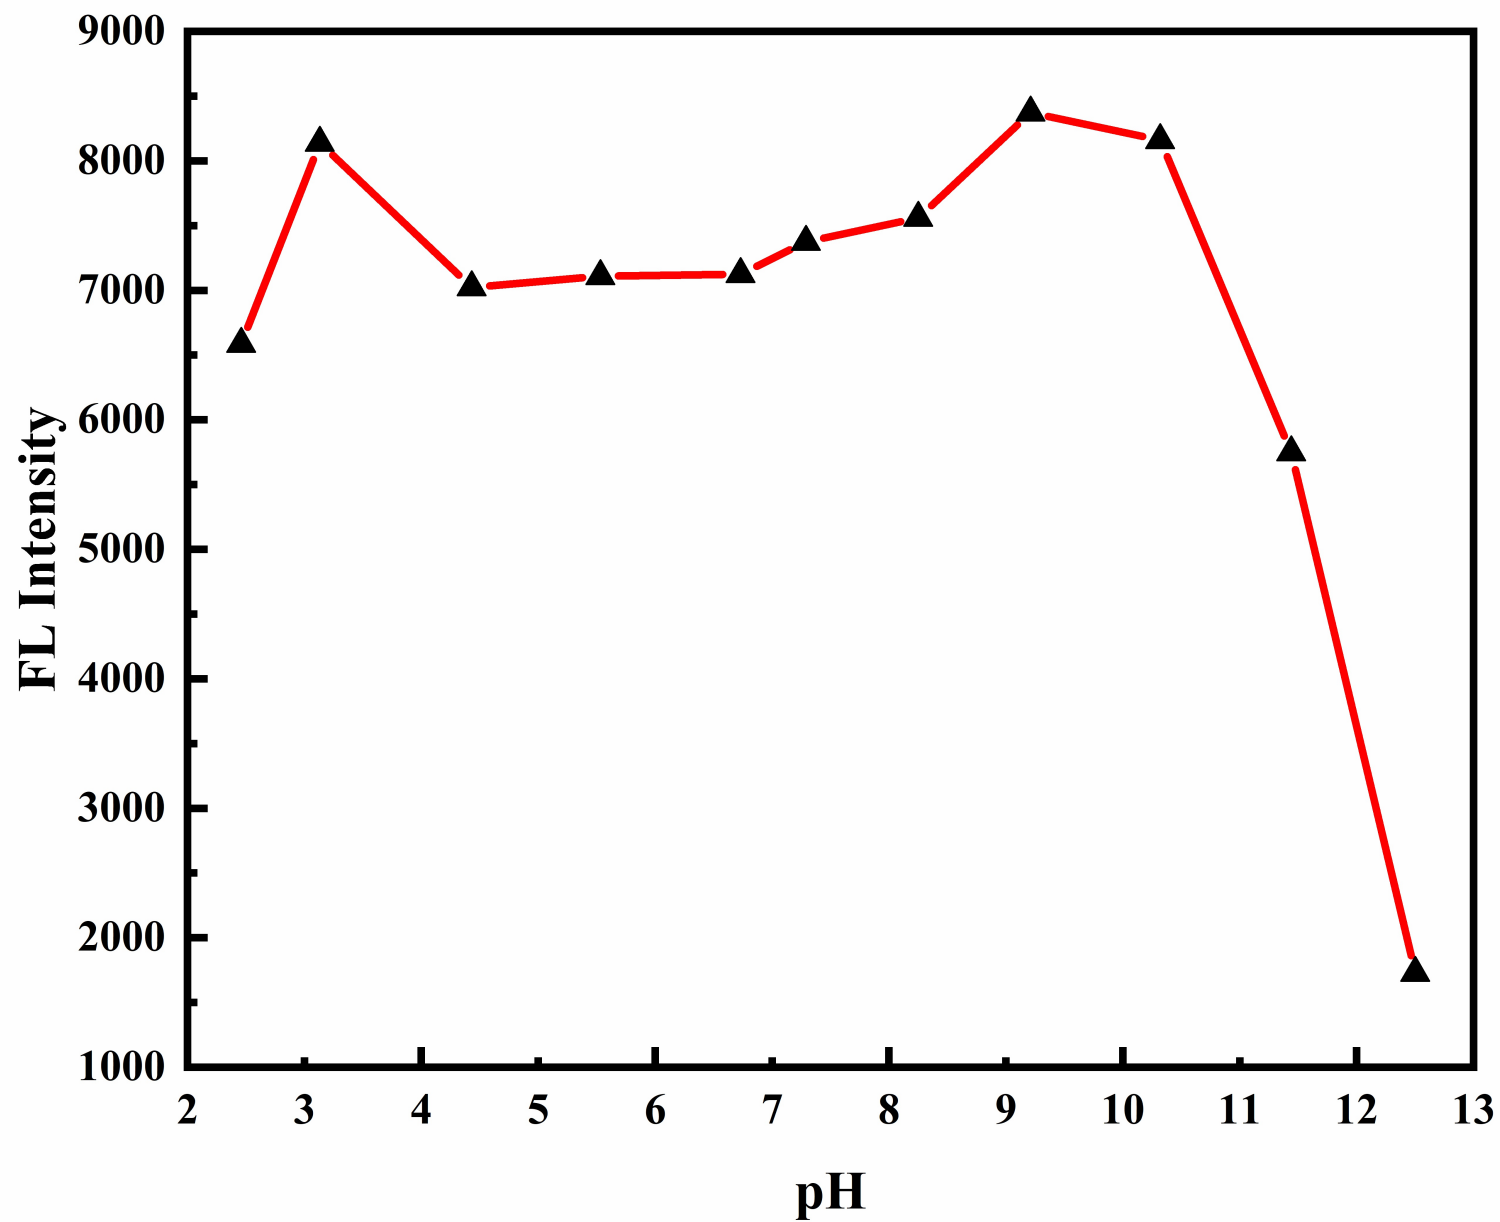

Supplement: d1nj05961k9.pdf [file d1nj05961k9.pdf]
